# Supplementary material
Source: publisher site journal article supplement (https://www.degruyterbrill.com/publication/isbn/9783805911252/downloadAsset/9783805911252_Inhaltsverzeichnis.pdf)
Supplement: Supplementary file 1 [file 9783805911252_Inhaltsverzeichnis.pdf]

# Inhaltsübersicht

|                                              | Seite <sup>*</sup> |
|----------------------------------------------|--------------------|
| Vorwort _____                                | IX                 |
| Buch 2 · Recht der Schuldverhältnisse        |                    |
| Abschnitt 8 · Einzelne Schuldverhältnisse    |                    |
| Titel 1 · Kauf, Tausch _____                 | 1                  |
| Untertitel 1 · Allgemeine Vorschriften _____ | 150                |
| Untertitel 2 · Besondere Arten des Kaufs     |                    |
| Kapitel 1 · Kauf auf Probe _____             | 829                |
| Kapitel 2 · Wiederkauf _____                 | 846                |
| Kapitel 3 · Vorkauf _____                    | 879                |
| Untertitel 3 · Verbrauchsgüterkauf _____     | 957                |
| Untertitel 4 · Tausch _____                  | 1140               |
| Sachregister _____                           | 1151               |

---

\* Zitiert wird nicht nach Seiten, sondern nach Paragraph bzw Artikel und Randnummer; siehe dazu auch S VI.
